# Supplementary material
Source: publisher site journal article supplement (https://www.dovepress.com/article/360202)
Supplement: Supplementary file 1 [file get_supplementary_file.php]

# 1 **Supplementary material**

## 2 **Supplementary Figure 1. Cumulative rate of clinical relapse and HBsAg loss after** 3 **discontinuation of NA therapy.**

4 (A) Clinical relapse was observed in 62 patients within 8 years of follow-up, with a cumulative  
5 incidence of 56.9% (HBeAg-positive vs. HBeAg-negative: 50.6% vs. 64.8%, log-rank test:  $p =$   
6 0.108). (B) Fourteen patients cleared HBsAg, resulting in a cumulative incidence of 23.4% at  
7 year 8.

## 8 **Supplementary Figure 2. Plasma sPD-1 levels at the end-of-treatment and clinical** 9 **relapse in patients with clinical relapse.**

10 Patients who developed clinical relapse had an estimated off-treatment sPD-1 increase of 1.05  
11  $\log_{10}$  pg/mL. (n=51) EOT, end of treatment; CR, clinical relapse.

## 12 **Supplementary Figure 3 Cumulative rate of HBsAg decline to <10 IU/mL and < 100 IU/mL** 13 **in patients with detectable and undetectable sPD-1.**

14 In patients with detectable and undetectable sPD-1, the cumulative rates of HBsAg decline to  
15 HBsAg < 10 IU/mL (A) and HBsAg < 100 IU/mL (B) were 38.6 % and 9.7% (log-rank test:  $p =$   
16 0.003), 55.2% and 26.7% (log-rank test:  $p = 0.008$ ), respectively.

# Supplementary Figure 1

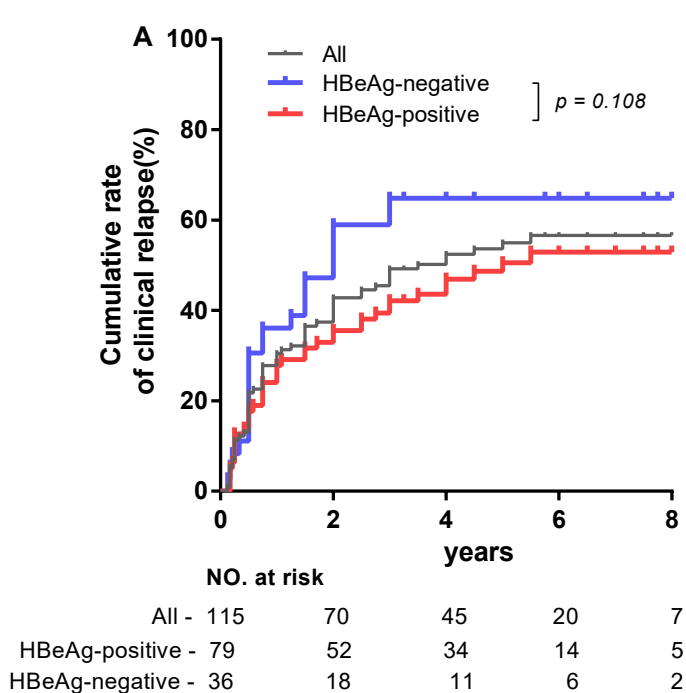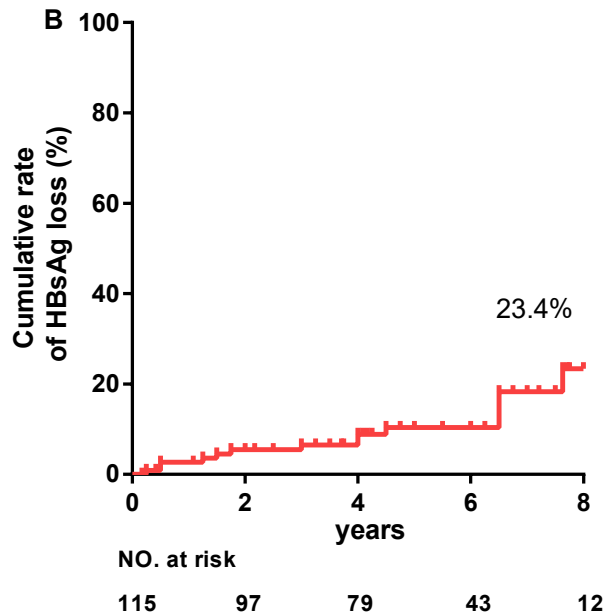

Supplementary Figure 2

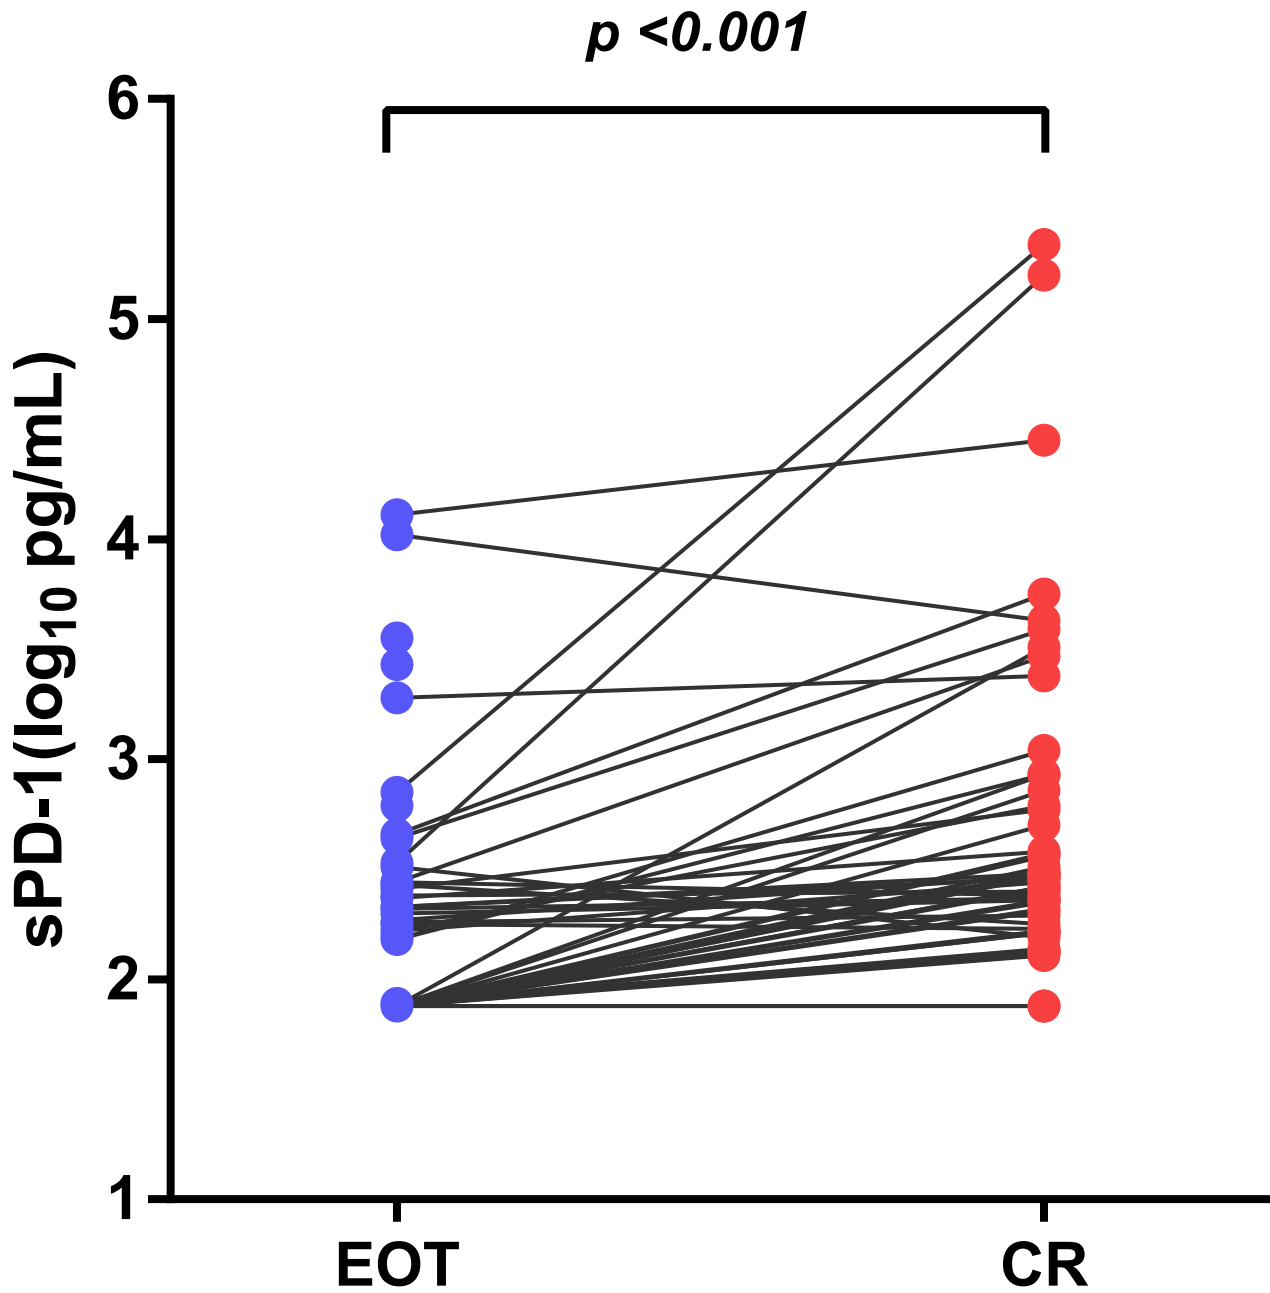

Supplementary Figure 3

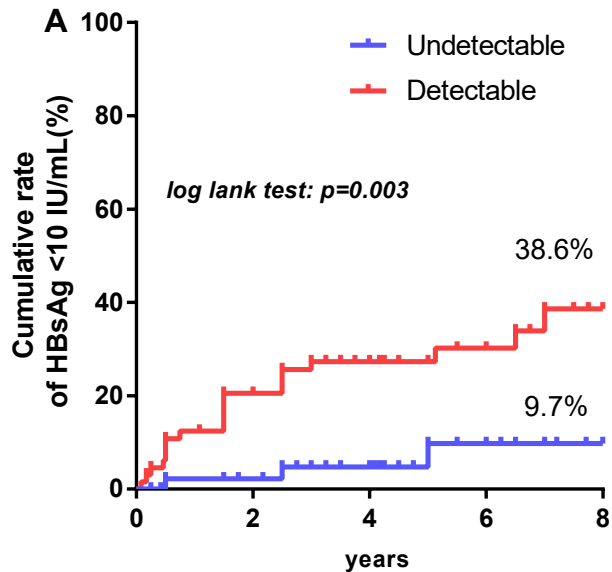

|              |      |    |    |    |   |
|--------------|------|----|----|----|---|
| Undetectable | - 47 | 40 | 31 | 14 | 5 |
| Detectable   | - 66 | 48 | 36 | 23 | 5 |

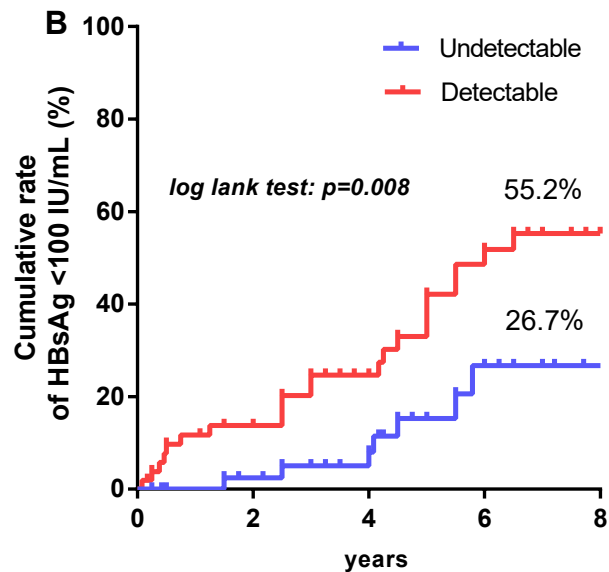

|              |      |    |    |    |   |
|--------------|------|----|----|----|---|
| Undetectable | - 44 | 38 | 12 | 12 | 4 |
| Detectable   | - 53 | 41 | 16 | 16 | 4 |
